# Supplementary material
Source: PubMed Central journal article supplement (PMC3754579)
Supplement: JB.00500-13_zjb999092739so1.pdf [file JB.00500-13_zjb999092739so1.pdf]

## SUPPLEMENTAL MATERIALS

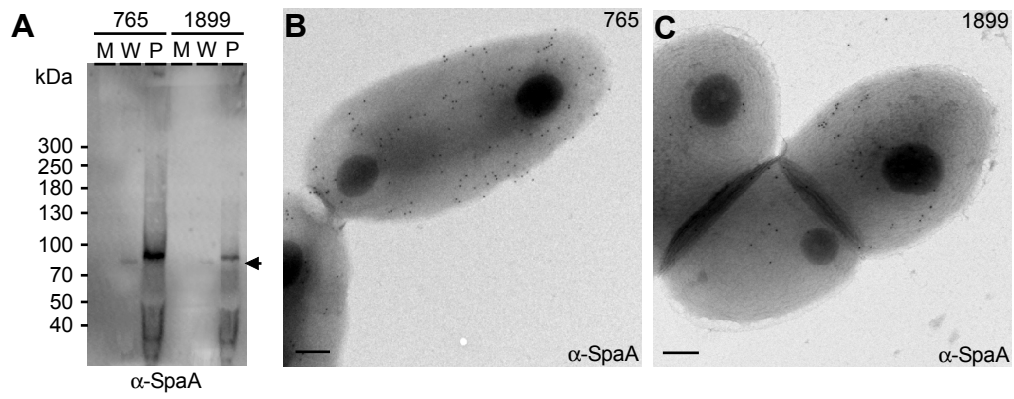

Figure S1: Broadway et al.

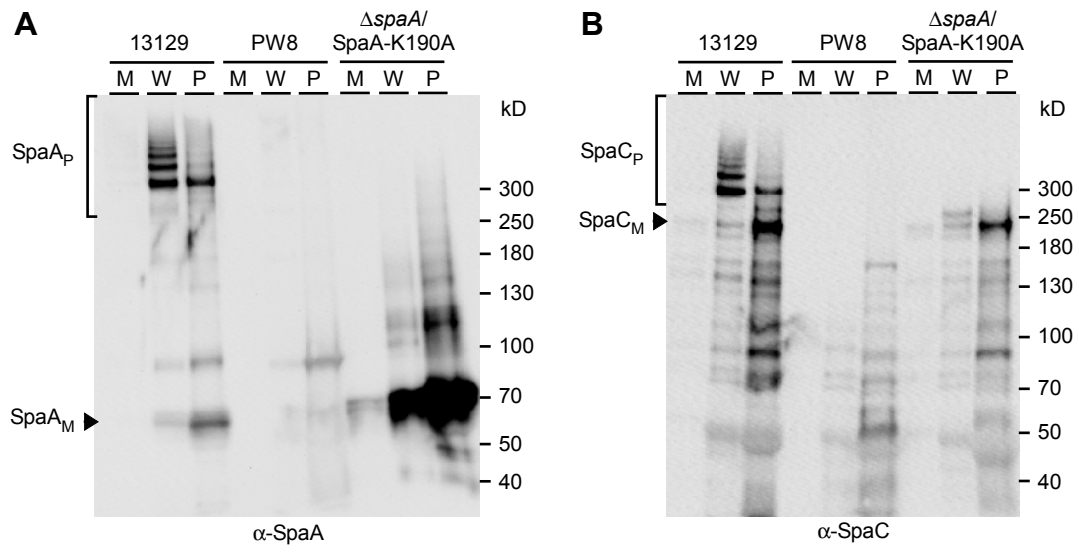

Figure S2: Broadway et al.

## SUPPLEMENTAL MATERIALS

### Figure Legends

**Figure S1:** Detection of SpaA in isolates 765 and 1899 by Western blotting and immuno-electron microscopy – (A) Culture medium (M), cell wall (W), and protoplast (P) fractions of isolates 765 (group 6) and 1899 (group 5) were subjected to immunoblotting with  $\alpha$ -SpaA. Markers (kDa) and SpaA monomers (arrow) were indicated. (B-C) Surface display of SpaA in the two isolates was examined by immuno-electron microscopy with  $\alpha$ -SpaA; bars of 200 nm.

**Figure S2:** Detection of SpaC in strain PW8 by Western blotting – Culture medium (M), cell wall (W), and protoplast (P) fractions of strains NCTC13128, PW8, and an isogenic *spaA* deletion mutant expressing SpaA-K190A ( $\Delta spaA/pSpaA$ -K190A) were subjected to immunoblotting with  $\alpha$ -SpaA (A) and  $\alpha$ -SpaC (B). Strain  $\Delta spaA/pSpaA$ -K190A was used as a control to detect SpaA and SpaC monomeric forms. Markers (kDa), Spa polymers (P), and monomers (M) were indicated.

**Table S1:** PCR<sup>a</sup> and western blot (WB<sup>b</sup>) analyses of corynebacterial strains

| Group | Strain | Origin              | Toxigenicity    |     | SpaA |                  | SpaD |    | SpaH |    | Reference  |
|-------|--------|---------------------|-----------------|-----|------|------------------|------|----|------|----|------------|
|       |        |                     | Reported        | PCR | PCR  | WB               | PCR  | WB | PCR  | WB |            |
| 1     | C65    | Canada              | -               | -   | -    | -                | -    | -  | -    | -  | (1)        |
|       | C64    | Canada              | -               | -   | -    | -                | -    | -  | -    | -  | This study |
|       | C78    | Canada              | -               | -   | -    | -                | -    | -  | -    | -  | (1)        |
|       | C50    | Kazakhstan          | -               | -   | -    | -                | -    | -  | -    | -  | (2)        |
|       | CD310  | US, Ohio            | ND <sup>c</sup> | -   | -    | -                | -    | -  | -    | -  | This study |
|       | CD317  | US, Maine           | ND              | -   | -    | -                | -    | -  | -    | -  | This study |
|       | CD376  | US,<br>Colorado     | ND              | -   | -    | -                | -    | -  | -    | -  | This study |
|       | G4193  | Russia              | -               | -   | -    | -                | -    | -  | -    | -  | (3)        |
| 2     | C52    | Kazakhstan          | -               | -   | +    | +                | -    | -  | -    | -  | (2)        |
|       | 760    | Russia              | -               | -   | +    | +                | -    | -  | -    | -  | (3)        |
|       | CD318  | US, Maine           | ND              | -   | +    | +                | -    | -  | -    | -  | This study |
| 3     | PR26   | US, South<br>Dakota | -               | -   | +    | +                | -    | -  | +    | +  | (1)        |
|       | PR120  | US, South<br>Dakota | -               | -   | +    | +                | -    | -  | +    | +  | (1)        |
|       | CD364  | US, New<br>York     | ND              | -   | +    | +                | -    | -  | +    | +  | This study |
| 4     | CD082  | Russia              | ND              | +   | -    | -                | -    | -  | -    | -  | This study |
|       | 496    | Russia              | +               | +   | -    | -                | -    | -  | -    | -  | (3)        |
|       | 718    | Russia              | +               | +   | -    | -                | -    | -  | -    | -  | (3)        |
|       | 713    | Russia              | +               | +   | -    | -                | -    | -  | -    | -  | (3)        |
|       | 724    | Russia              | +               | +   | -    | -                | -    | -  | -    | -  | (3)        |
|       | C5276  | US, South<br>Dakota | +               | +   | -    | -                | -    | -  | -    | -  | (1)        |
|       | PR110  | US, South<br>Dakota | +               | +   | -    | -                | -    | -  | -    | -  | (1)        |
|       | G4219  | US, South<br>Dakota | +               | +   | -    | -                | -    | -  | -    | -  | (3)        |
| 5     | 1751   | Ukraine             | +               | +   | +    | +                | -    | -  | -    | -  | (3)        |
|       | G4212  | Russia              | +               | +   | +    | +                | -    | -  | -    | -  | (3)        |
|       | 1899   | Russia              | +               | +   | +    | + <sup>(d)</sup> | -    | -  | -    | -  | (3)        |
|       | 711    | Russia              | +               | +   | +    | +                | -    | -  | -    | -  | (3)        |
|       | G4182  | Russia              | +               | +   | +    | +                | -    | -  | -    | -  | (3)        |
|       | 1709   | Russia              | +               | +   | +    | +                | -    | -  | -    | -  | (3)        |

|   |                            |                  |    |   |   |      |   |   |   |   |            |
|---|----------------------------|------------------|----|---|---|------|---|---|---|---|------------|
|   | 750                        | Russia           | +  | + | + | +    | - | - | - | - | (3)        |
|   | PR75                       | US, South Dakota | +  | + | + | +    | - | - | - | - | (1)        |
|   | G4217                      | US, South Dakota | +  | + | + | +    | - | - | - | - | (1)        |
|   | A12                        | US, Virginia     | +  | + | + | +    | - | - | - | - | (4)        |
|   | CD028                      | Canada           | ND | + | + | +    | - | - | - | - | This study |
| 6 | 722                        | Russia           | +  | + | + | +    | - | - | + | + | (3)        |
|   | E8277                      | US, South Dakota | +  | + | + | +    | + | + | - | - | (1)        |
|   | 765                        | Russia           | +  | + | + | +(d) | + | + | - | - | (3)        |
| 7 | 1716                       | Russia           | +  | + | + | +    | + | + | + | + | (3)        |
|   | 1718                       | Russia           | +  | + | + | +    | + | + | + | + | (3)        |
|   | 1737                       | Russia           | +  | + | + | +    | + | + | + | + | (3)        |
|   | 1897                       | Ukraine          | +  | + | + | +    | + | + | + | + | (3)        |
|   | G4174                      | Russia           | +  | + | + | +    | + | + | + | + | (3)        |
|   | 749                        | Russia           | +  | + | + | +    | + | + | + | + | (3)        |
|   | 13129                      | UK               | +  | + | + | +    | + | + | + | + | (5)        |
|   | $\Delta spaABC$            | Isogeny of 13129 | ND | + | - | -    | + | + | + | + | This study |
|   | $\Delta spaABC/\Delta tox$ | Isogeny of 13129 | ND | - | - | -    | + | + | + | + | This study |
|   | $\Delta spaDEF$            | Isogeny of 13129 | ND | + | + | +    | - | - | + | + | This study |
|   | $\Delta spaHIG$            | Isogeny of 13129 | ND | + | + | +    | + | + | - | - | This study |
|   | $\Delta spaA-G$            | Isogeny of 13129 | ND | + | - | -    | - | - | - | - | This study |

<sup>a</sup>Several pairs of primers were designed to PCR-amplify the coding sequence of *tox*, *spaA*, *spaD* and *spaH* (Table S2).

<sup>b</sup>Several pairs of primers were designed to PCR-amplify the coding sequence of *tox*, *spaA*, *spaD* and *spaH*.

<sup>c</sup>ND – not determined.

<sup>d</sup>Only SpaA monomers were observed (see Fig. S1).

**Table S2:** Primers used in this study

| Primers       | Sequence 5' to 3'       | Position <sup>(a)</sup> |
|---------------|-------------------------|-------------------------|
| spaA1_Foward  | GTGGGGGAGAACGTGAAGTA    | 673-693                 |
| spaA1_Reverse | TCTTGGCCGGTAACAAACTC    | 1226-1246               |
| spaA2_Foward  | ACGTCACACTTGCCTCAGTG    | 62-81                   |
| spaA2_Reverse | CGGTGAAACCCTCGAACTTA    | 715-735                 |
| spaA3_Foward  | CCGTACTIONCAGCGTGCAACTA | 839-859                 |
| spaA3_Reverse | CCTGTGAGTGGCAGTTCAAA    | 1484-1504               |
| spaB1_Foward  | CACACGCACAAGAAGCAAAC    | 94-114                  |
| spaB1_Reverse | CGTCGAGTGCCTAGTAGTGC    | 628-648                 |
| spaB2_Foward  | CTTCGCAGGAAGAGGACAAC    | 5-25                    |
| spaB2_Reverse | GATGAGGGTGCTGATGGTG     | 602-621                 |
| spaC1_Foward  | AAGGCGTAGTGGATGAAACG    | 4312-4322               |
| spaC1_Reverse | AAATCGGACGGTCTGTCAAC    | 4830-4850               |
| spaC2_Foward  | TGCAGACGGAAACGTGATAG    | 701-721                 |
| spaC2_Reverse | TTCGCACTGAGTTCCAACAG    | 1229-1249               |
| spaD1_Foward  | GGCATCTACCTCGTTGAGGA    | 193-213                 |
| spaD1_Reverse | TGCCGTCCTTCTTAACAACC    | 790-810                 |
| spaD2_Foward  | TGCTGGTGAGCCACTAAATG    | 12-32                   |
| spaD2_Reverse | CCCGACTTGACCTTCTTCAG    | 614-634                 |
| spaD3_Foward  | TACCCGAAGAACACCGAAAC    | 313-333                 |
| spaD3_Reverse | TTTTGACACCGTCCACAGTC    | 892-912                 |
| spaE1_Foward  | GAAGGGCATCTACCTAGTCA    | 387-406                 |
| spaE1_Reverse | GTTGCGTCTTTCTCAT        | 658-677                 |
| spaE2_Foward  | GATCAAAGCCGTGACCAA      | 336-354                 |
| spaE2_Reverse | AACCGTGGAGTTCGTCTT      | 546-564                 |
| spaF1_Foward  | ATAAGAAGGTCAGCGTCAAA    | 232-252                 |
| spaF1_Reverse | ATCTACTGGGTCAGCTTCAA    | 797-817                 |
| spaF2_Foward  | GCAACGGTTCTACTAACTGG    | 1477-1497               |
| spaF2_Reverse | TGTGAGTACTGCTCAACTCG    | 2047-2067               |
| spaH1_Foward  | ACGGCAATATCGACTTCACC    | 140-160                 |
| spaH1_Reverse | TCAGACCCGACGTTAAGACC    | 674-694                 |
| spaH2_Foward  | GAAGGTGGCTGAGGACAAAG    | 705-725                 |
| spaH2_Reverse | TACTCCGGACCACAAGTTCC    | 1265-1285               |
| spaH3_Foward  | GACCCGACCAAAGACGATAA    | 361-381                 |
| spaH3_Reverse | CAGCAGCATTCTTCAGCTTG    | 910-930                 |
| spaI1_Foward  | GATAGAAGGCATCGATCTCA    | 203-223                 |
| spaI1_Reverse | TTCCTTACGGAACTTCTCTG    | 638-658                 |
| spaI2_Foward  | GCTCAACATTTCCGATATTC    | 68-88                   |
| spaI2_Reverse | AAGATCGTCAGTGTCTTTGG    | 515-535                 |
| spaG1_Foward  | ACCTACTATCTGCGTGAGGA    | 1961-1981               |
| spaG1_Reverse | CGTCCTTCTTGGCTTTATTA    | 2483-2503               |
| spaG2_Foward  | AACGGTCTTGGTGTCTCTAA    | 371-391                 |
| spaG2_Reverse | GATGAGTCAAAGGCAAAGTC    | 924-944                 |
| Tox_Foward    | AACGGCATTAGAGCATCCTG    | 717-737                 |
| Tox_Reverse   | ATAGCTCTGCAACGCATCCT    | 1352-1372               |
| 16S_Foward    | CGGAATTACTIONGGCGTAAAG  | 502-522                 |
| 16S_Reverse   | CTCTCATGAGTCCCCACCAT    | 1103-1123               |

<sup>(a)</sup>Based on nucleotide sequences of indicated open-reading-frames of the sequenced strain NCTC13129.

## Reference

1. **Marston, C. K., F. Jamieson, F. Cahoon, G. Lesiak, A. Golaz, M. Reeves, and T. Popovic.** 2001. Persistence of a distinct *Corynebacterium diphtheriae* clonal group within two communities in the United States and Canada where diphtheria is endemic. *J Clin Microbiol* **39**:1586-1590.
2. **Mothershed, E. A., P. K. Cassidy, K. Pierson, L. W. Mayer, and T. Popovic.** 2002. Development of a real-time fluorescence PCR assay for rapid detection of the diphtheria toxin gene. *J Clin Microbiol* **40**:4713-4719.
3. **Popovic, T., S. Y. Kombarova, M. W. Reeves, H. Nakao, I. K. Mazurova, M. Wharton, I. K. Wachsmuth, and J. D. Wenger.** 1996. Molecular epidemiology of diphtheria in Russia, 1985-1994. *J Infect Dis* **174**:1064-1072.
4. **Henricson, B., M. Segarra, J. Garvin, J. Burns, S. Jenkins, C. Kim, T. Popovic, A. Golaz, and B. Akey.** 2000. Toxigenic *Corynebacterium diphtheriae* associated with an equine wound infection. *J Vet Diagn Invest* **12**:253-257.
5. **Cerdeno-Tarraga, A. M., A. Efstratiou, L. G. Dover, M. T. Holden, M. Pallen, S. D. Bentley, G. S. Besra, C. Churcher, K. D. James, A. De Zoysa, T. Chillingworth, A. Cronin, L. Dowd, T. Feltwell, N. Hamlin, S. Holroyd, K. Jagels, S. Moule, M. A. Quail, E. Rabinowitsch, K. M. Rutherford, N. R. Thomson, L. Unwin, S. Whitehead, B. G. Barrell, and J. Parkhill.** 2003. The complete genome sequence and analysis of *Corynebacterium diphtheriae* NCTC13129. *Nucleic Acids Res* **31**:6516-6523.
